# Supplementary material for: Size effects of self-assembled block copolymer spherical micelles and vesicles on cellular uptake in human colon carcinoma cells
Source: Royal Society of Chemistry journal article supplement (doi:10.1039/c3tb21751e), 2014-01-01
Supplement: c3tb21751e1.pdf [file c3tb21751e1.pdf]

## SUPPLEMENTARY DATA

### Size effects of self-assembled block copolymers spherical micelles and vesicle on cellular uptake in human colon carcinoma cells

Teddy Chang, Megan S. Lord, Björn Bergmann, Alex Macmillan and Martina H. Stenzel

**Table S1:** Summary of results of the homopolymerization of POEGMEMA in toluene at 70°C in the presence of CPADB RAFT at a ratio of 1:100.

| Polymerization Time (h) | Conversion* (%) | M <sub>n</sub> (Theo) g/mol | M <sub>n</sub> (GPC) g/mol | PDI  |
|-------------------------|-----------------|-----------------------------|----------------------------|------|
| 1.5                     | 13              | 4180                        | 3580                       | 1.20 |
| 2                       | 20              | 6280                        | 9600                       | 1.23 |
| 5                       | 42              | 12880                       | 14200                      | 1.19 |
| 8                       | 57              | 17380                       | 19500                      | 1.12 |

\* The monomer conversion was calculated from the <sup>1</sup>H NMR of the reaction mixture as seen in Figure S1. The theoretical molecular weight was calculated from linear relationship between molecular weight and conversion by Equation 2

$$M_n = ([M]_0/[RAFT]_0) * x * MW_{\text{monomer}} + MW_{\text{RAFT}} \quad (\text{Eq 2})$$

where

[M]<sub>0</sub> = Monomer Concentration

[RAFT]<sub>0</sub> = RAFT Agent Concentration

X = Monomer Conversion

MW<sub>monomer</sub> = Molecular Weight of Monomer

MW<sub>RAFT</sub> = Molecular Weight of RAFT Agent

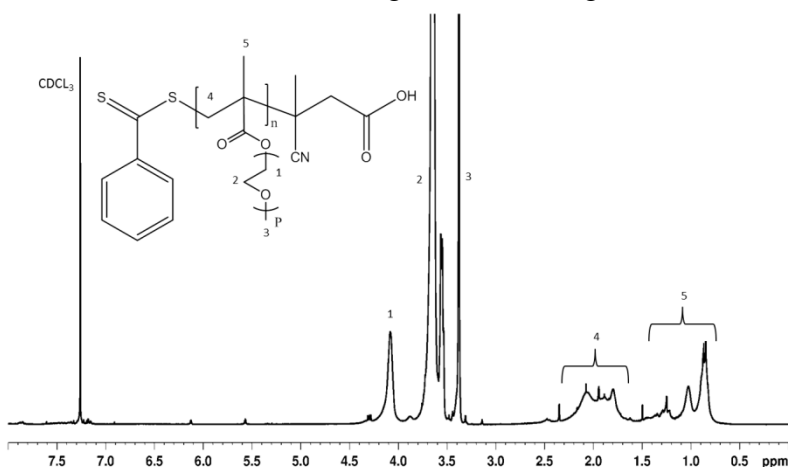

**Figure S1:** <sup>1</sup>H NMR spectroscopy of the “marcoRAFT” from the hydrophilic monomer POEGMEMA and RAFT agent CPADB.

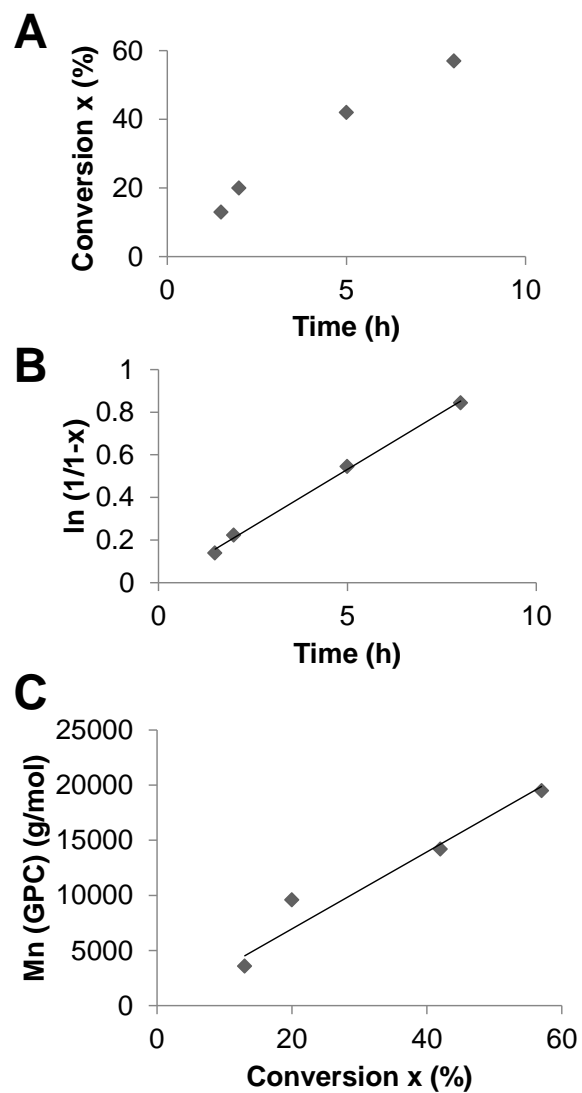

**Figure S2:** RAFT polymerization of POEGMEMA using CPADB RAFT in toluene at 70°C ([M] : [RAFT] : [AIBN] = 100 : 1 : 0.2). (A) Monomer conversion at different time intervals (B) A pseudo-first-order kinetic plot for the homopolymerization (C) Molecular Weight  $M_n$  as obtained by DMAc GPC.

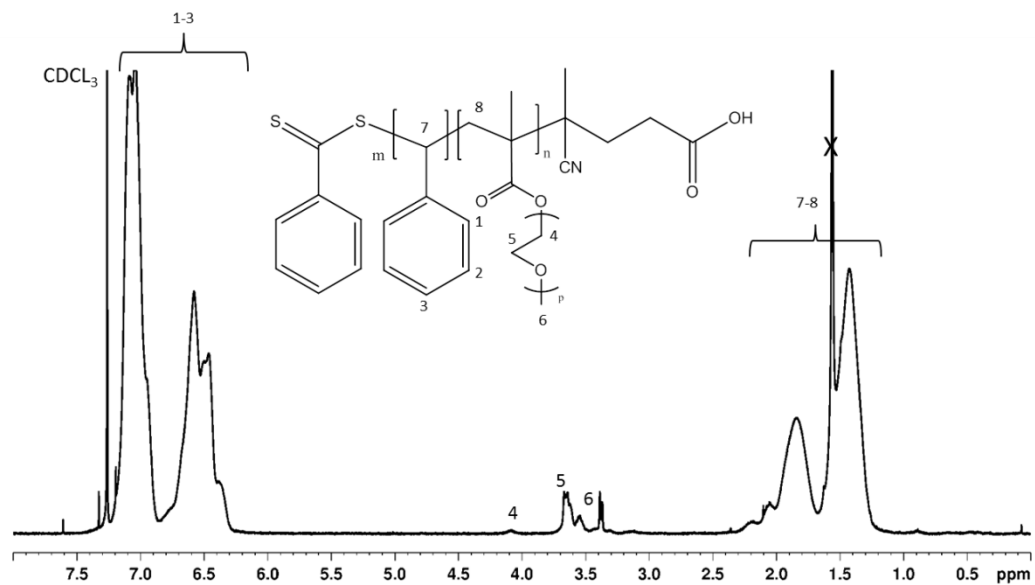

**Figure S3:**  $^1\text{H}$  NMR spectroscopy of the block copolymer from the hydrophobic monomer styrene and the marcoRAFT.

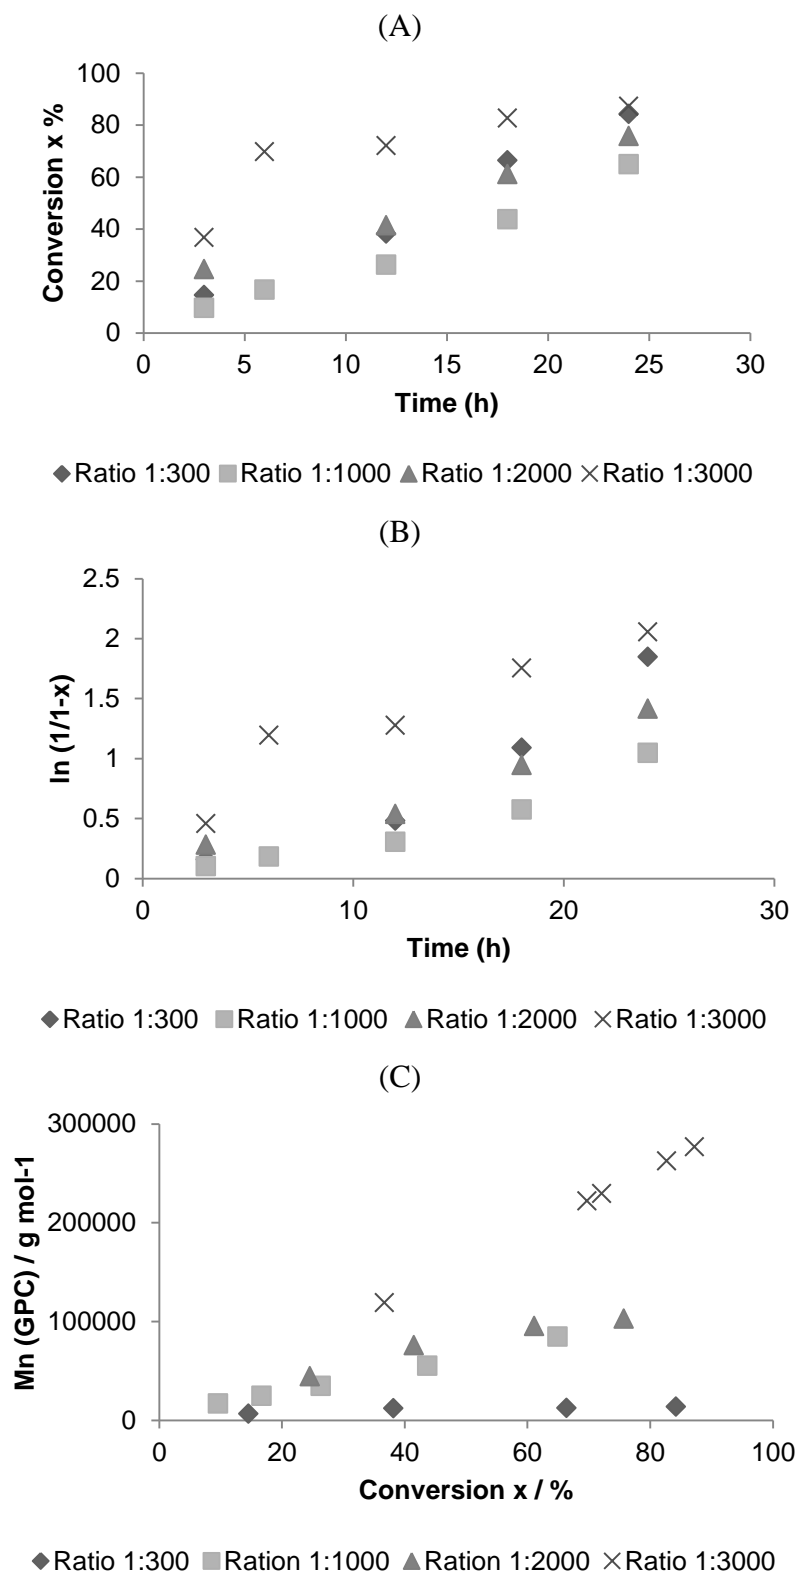

**Figure S4:** (A) Time vs. monomer conversion, (B) pseudo-first order kinetic plot, (C) and Mn vs. monomer conversion of the polymerization of styrene in the presence of POEGMEMA macroRAFT agent ( $M_n(\text{theo})=3879.38 \text{ g mol}^{-1}$ ) in toluene at  $70^\circ\text{C}$  ([POEGMEMA macroRAFT] : [Styrene] : [AIBN] = 1 : 300-3000 : 0.1).

**Table S3:** Molecular weight and conversion of the copolymerization of styrene in the presence of POEGMEMA macroRAFT ( $M_n(\text{theo}) = 3879.38 \text{ g mol}^{-1}$ ,  $\text{PDI} = 1.20$ ) at  $100^\circ\text{C}$  in bulk where RU=repeating units. (A)  $[\text{styrene}] = 7.67 \text{ mol L}^{-1}$ ,  $[\text{POEGMEMA macroRAFT}] = 2.54 \times 10^{-2} \text{ mol L}^{-1}$ , (B)  $[\text{styrene}] = 8.73 \text{ mol L}^{-1}$ ,  $[\text{POEGMEMA macroRAFT}] = 8.73 \times 10^{-3} \text{ mol L}^{-1}$ , (C)  $[\text{styrene}] = 8.74 \text{ mol L}^{-1}$ ,  $[\text{POEGMEMA macroRAFT}] = 4.37 \times 10^{-3} \text{ mol L}^{-1}$ , (D)  $[\text{styrene}] = 8.72 \text{ mol L}^{-1}$ ,  $[\text{POEGMEMA macroRAFT}] = 2.91 \times 10^{-3} \text{ mol L}^{-1}$

(A)

| Polymerization Time (h) | Conversion (%) | Styrene RU | $M_n$ (Theo) | $M_n$ (GPC) | PDI  |
|-------------------------|----------------|------------|--------------|-------------|------|
| 6                       | 14.56          | 44         | 8400         | 6500        | 1.18 |
| 12                      | 38.17          | 115        | 16000        | 12000       | 1.29 |
| 18                      | 66.36          | 199        | 24600        | 22300       | 1.29 |
| 24                      | 84.21          | 253        | 30200        | 26700       | 1.29 |

(B)

| Polymerization Time (h) | Conversion (%) | Styrene RU | $M_n$ (Theo) | $M_n$ (GPC) | PDI  |
|-------------------------|----------------|------------|--------------|-------------|------|
| 3                       | 9.6            | 96         | 14200        | 17000       | 1.31 |
| 6                       | 16.7           | 167        | 21600        | 24800       | 1.32 |
| 12                      | 26.3           | 263        | 31600        | 34800       | 1.31 |
| 18                      | 43.7           | 437        | 49700        | 55000       | 1.38 |
| 24                      | 64.9           | 649        | 71800        | 84500       | 1.41 |

(C)

| Polymerization Time (h) | Conversion (%) | Styrene RU | $M_n$ (Theo) | $M_n$ (GPC) | PDI  |
|-------------------------|----------------|------------|--------------|-------------|------|
| 6                       | 24.53          | 490        | 51000        | 44300       | 1.27 |
| 12                      | 41.47          | 829        | 86200        | 75800       | 1.40 |
| 18                      | 61.12          | 1222       | 127000       | 95500       | 1.57 |
| 24                      | 75.72          | 1514       | 157000       | 102800      | 1.65 |

(D)

| Polymerization Time (h) | Conversion (%) | Styrene RU | $M_n$ (Theo) | $M_n$ (GPC) | PDI  |
|-------------------------|----------------|------------|--------------|-------------|------|
| 3                       | 36.7           | 1101       | 166000       | 183000      | 1.44 |
| 6                       | 69.7           | 2091       | 222000       | 219000      | 1.77 |
| 12                      | 72.1           | 2163       | 229000       | 193000      | 1.65 |
| 18                      | 82.7           | 2481       | 263000       | 232000      | 1.54 |
| 24                      | 87.2           | 2616       | 277000       | 245000      | 1.52 |

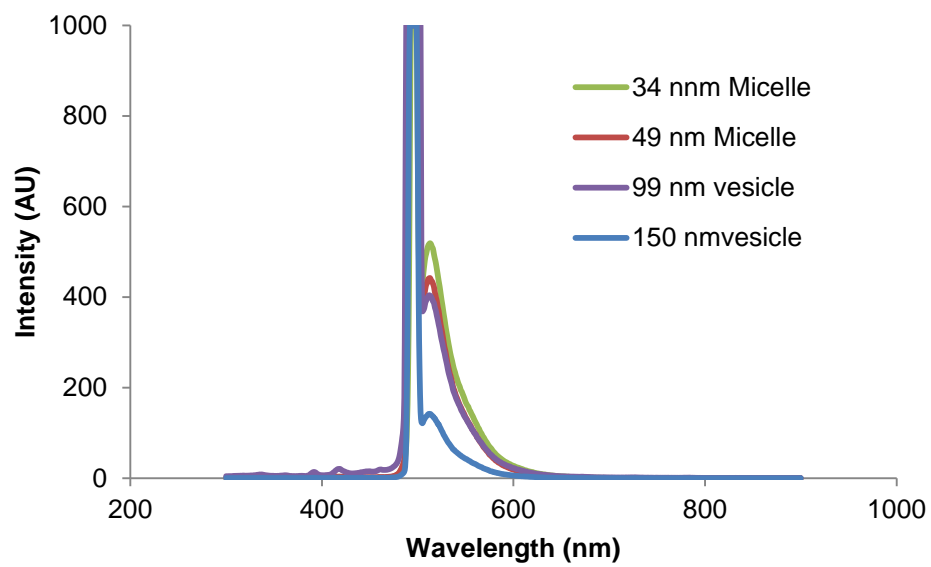

Figure S5: Fluorescence intensities of 150nm vesicles of polymers.

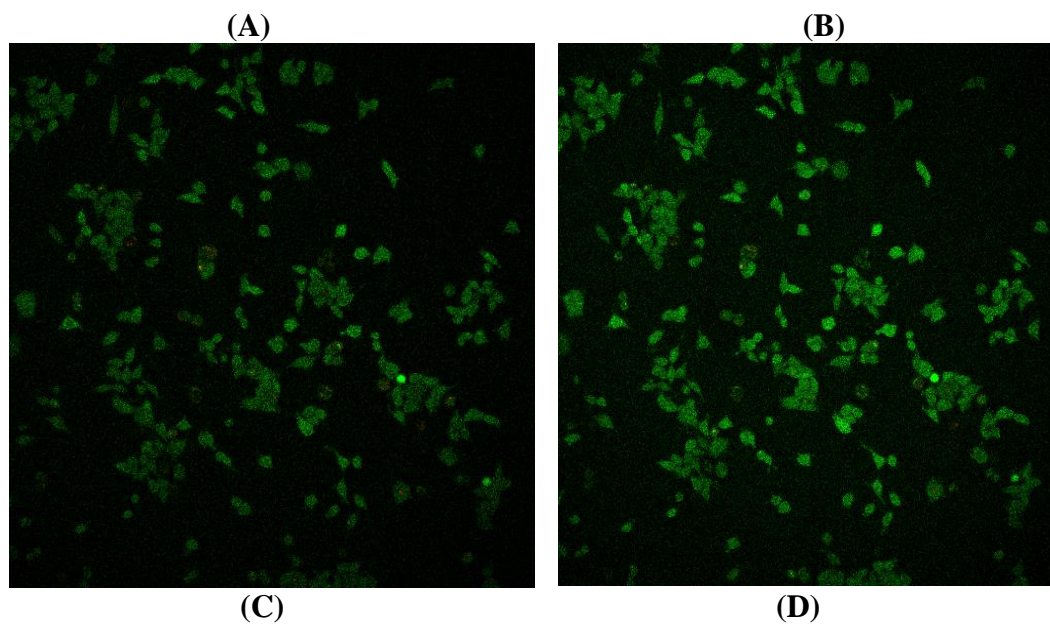

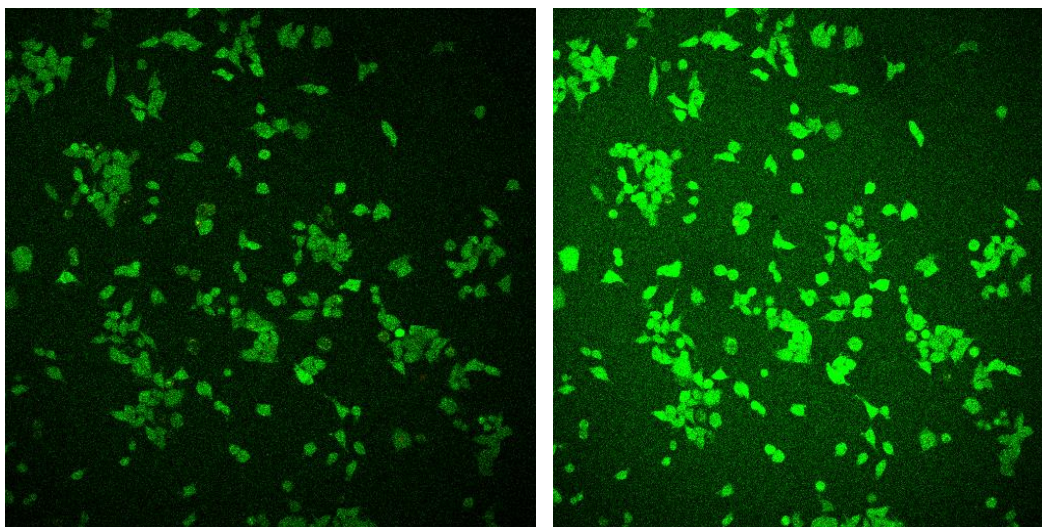

**Figure S6:** The green emissions within the cells are a result of the polymer uptake. The yellow is the overlap of the green aggregates and the red lysosomes. The polymers are internalized immediately and continue to enter the cell over time. A) 2 minutes, B) 10 minutes, C) 30 minutes, D) 120 minutes
